1  
2  
3  
4  
5  
6  
7  
8  
9  
10  
11  
12  
13  
14  
15  
16  
17  
18  
19  
20  
21  
22  
23  
24  
25  
26  
27  
28  
29  
30

**Human Argonaute2 and Argonaute3 are catalytically activated by different lengths of guide RNA**

Mi Seul Park<sup>1,2</sup>, GeunYoung Sim<sup>2,3</sup>, Audrey C. Kehling<sup>1</sup>, and Kotaro Nakanishi<sup>1,2,3,\*</sup>

<sup>1</sup>Department of Chemistry and Biochemistry, The Ohio State University, Columbus, OH 43210, USA

<sup>2</sup>Center for RNA Biology

<sup>3</sup>Molecular, Cellular and Developmental Biology

\*Correspondence: [nakanishi.9@osu.edu](mailto:nakanishi.9@osu.edu)

Keywords: RNAi, Argonaute, non-coding RNA, enzyme

31 **Abstract**

32 RNA interfering is a eukaryote-specific gene silencing by 20~23 nucleotide (nt) microRNAs and  
33 small interfering RNAs that recruit Argonaute proteins to complementary RNAs for degradation.  
34 In humans, Argonaute2 (AGO2) has been known as the only slicer while Argonaute3 (AGO3)  
35 barely cleaves RNAs. Therefore, the intrinsic slicing activity of AGO3 remains controversial and  
36 a long-standing question. Here, we report 14-nt 3' end-shortened variants of let-7a, miR-27a, and  
37 specific miR-17-92 families that make AGO3 an extremely competent slicer by an ~ 82-fold  
38 increase in target cleavage. These RNAs, named cleavage-inducing tiny guide RNAs  
39 (cityRNAs), conversely lower the activity of AGO2, demonstrating that AGO2 and AGO3 have  
40 different optimum guide lengths for target cleavage. Our study sheds light on the role of tiny  
41 guide RNAs.

## 42 **Introduction**

43 MicroRNAs (miRNAs) are small non-coding RNAs that control gene expression post-  
44 transcriptionally (1, 2). Their sequences differ, but their lengths fall within a range of 20~23 nt  
45 because the precursor miRNAs are processed by Dicer, which is a molecular ruler that generates  
46 size-specific miRNA duplexes (3, 4). After those duplexes are loaded into AGOs, one of the two  
47 strands is ejected while the remaining strand (guide strand) and the AGO form the RNA-induced  
48 silencing complex (RISC) (5). Therefore, the 20~23-nt length is the hallmark of intact miRNAs.  
49 This size definition has been exploited as the rationale for eliminating ~18-nt RNAs when AGO-  
50 bound miRNAs are analyzed by next-generation RNA sequencing (RNAseq). However, RNAseq  
51 without a size exclusion reported a substantial number of ~18-nt RNAs bound to AGOs (6-8).  
52 Such tiny guide RNAs (tyRNAs) are abundant in extracellular vesicles of plants (9), but little is  
53 known about their roles or biogenesis pathways. In mammals, the roles of tyRNAs are even more  
54 enigmatic.

55         The goal of this study was to understand target-RNA cleavage by human AGOs. In 2004,  
56 two groups reported that only AGO2 showed the guide-dependent target cleavage in vitro (10,  
57 11). Since then, AGO1, AGO3, and AGO4 were thought to be deficient in RNA cleavage, even  
58 though AGO3 shares the same catalytic tetrad with AGO2. Recently, we revealed that specific  
59 miRNAs such as 23-nt miR-20a make AGO3 a slicer, but the activity was much lower than that  
60 of AGO2 (12). Therefore, it remained unclear whether AGO3 becomes a highly competent slicer  
61 as well. We revisited this long-standing question by investigating the effect of the guide length  
62 on target cleavage and discovered the unexpected role of tyRNAs in the catalytic activation of  
63 AGO3.

## 64 **Results**

65 Purified recombinant proteins of AGO2 and AGO3 (12) were pre-incubated with either of 8, 10,  
66 12, 13, 14, 15, 16, or 23-nt single-stranded synthetic miR-20a whose 3' 7~15 nt are deleted,  
67 followed by addition of a cap-labeled target RNA (Fig. 1A) as previously reported (13). While  
68 AGO2 reduced slicing activity with a shorter guide, AGO3 showed the highest cleavage activity  
69 with the 14-nt guide (Fig. 1B top and middle). Notably, the slicing activity of AGO3 with the 14-  
70 nt miR-20a was about 30-fold higher than its 23-nt intact form (Fig. 1B bottom), which resulted  
71 in AGO3 being a comparative slicer to AGO2. Supporting this, the kinetics of target cleavage  
72 with the 14- and 23-nt guide showed opposite trends between AGO2 and AGO3 (Fig. 1C). These  
73 results suggest that AGO2 and AGO3 have different optimum lengths of guide RNA for target  
74 cleavage.

75 Intact miRNAs of let-7a, miR-16, and miR-19b are known to activate AGO2 but not  
76 AGO3 (12). To test whether their 14-nt tyRNAs serve as cityRNAs, recombinant AGO2 and  
77 AGO3 were programmed with either of their intact miRNA or tyRNA and subsequently  
78 incubated with the cap-labeled target RNA (Fig. 1D). Loading of the tyRNAs drastically  
79 decreased or ruined the slicing activity of AGO2, compared to that of their intact form (Fig. 1E).  
80 In contrast, not the 14-nt miR-16 or miR-19b, but the 14-nt let-7a conferred extremely competent  
81 slicing activity on AGO3. To find more cityRNAs, 14-nt tyRNAs of miR-17, miR-18a, miR-19a,  
82 miR-27a, and miR-92a (Fig. 1D) were tested for in vitro target cleavage. Again, AGO2 reduced  
83 slicing activity with their 14-nt tyRNAs whereas AGO3 became a remarkably competent slicer  
84 when loaded with all except for the 14-nt miR-19a (Fig. 1E). These results indicate that some  
85 cityRNAs make AGO3 a superior slicer to AGO2.

86 Unlike miRNA duplexes, 14-nt RNAs are too short to form stable double-stranded  
87 RNAs. Thus, we thought that such short RNAs could be loaded as a single-stranded RNA into  
88 AGOs. To test this idea, we performed a RISC maturation assay (14, 15). In the positive control  
89 experiment, the 23-nt siRNA-like duplex of miR-20a (p23ds) was used instead of p14ss (Fig.  
90 2A). As expected, the provided 23-nt duplex was detected as its single intact strand in both  
91 AGO2 and AGO3 (Fig. 2B). Similarly, the intact 14-nt miR-20a was detected from both AGOs  
92 (Fig. 2B), demonstrating that AGO2 and AGO3 can incorporate the 14-nt ssRNAs in the cell  
93 lysate. Next, those assembled RISCs were immunopurified from the cell lysate and tested for  
94 slicing activity. FLAG-AGO2 cleaved RNAs very well when the lysate was incubated with the

95 23-nt siRNA-like duplex of miR-20a (23ds) (Figs. 2A and 2C). In contrast, FLAG-AGO3  
96 became a very competent slicer when the 14-nt single-stranded miR-20a (14ss) was added to the  
97 lysate (Fig. 2C). To confirm that the observed RNA cleavage was due to the catalytic activity of  
98 AGO3, we repeated the experiment using a catalytically dead mutant, FLAG-AGO3 (E638A)  
99 (12). This mutant loaded both p14ss and p23ds to form the mature RISCs (Figs. 2A-B) but did  
100 not show slicing activity at all (Fig. 2C), proving that the catalytic center of AGO3 is essential  
101 for the cityRNA-dependent target cleavage. Lastly, we tested whether AGO3 incorporates 14-nt  
102 single-stranded RNAs within the cell to assemble a functional slicer. The 14-nt single-stranded  
103 miR-20a was modified, according to a previous report (16), to make it stable during and after  
104 transfection (14md in Fig. 2A). When programmed with the 14md, the recombinant AGO3  
105 showed a slightly higher target cleavage than with the unmodified form (Fig. 2D), indicating that  
106 the modified guide retained the ability to catalytically activate AGO3. Then, HEK293T cells  
107 were co-transfected with a plasmid encoding FLAG-AGO2 or FLAG-AGO3 and either the 14ss,  
108 the 14md, or the 23ds. Immunopurified FLAG-AGO2 cleaved RNA very well with transfection  
109 of the 23ds (Fig. 2E). In contrast, FLAG-AGO3 cleaved the target RNA only when the 14md  
110 was co-transfected. These results demonstrate that AGO3 and 14-nt ssRNAs assemble into an  
111 active slicer in vivo.

112 **Discussion**

113 AGO2 cleaves any RNAs including a sequence fully complementary to the guide RNA, which  
114 means that any guide RNAs can activate AGO2. This is not the case for the AGO3 activation.  
115 Only specific tyRNAs can serve as cityRNAs due to their unique sequences. These multiple  
116 requirements extremely limit the opportunities for catalytically activating AGO3. That is why the  
117 slicing activity has not been unveiled for a long time (10, 11). Since AGO3 has retained the  
118 catalytic center throughout its molecular evolution, the cityRNA-dependent slicing activity could  
119 have a conserved role in or beyond RNA interference when all the requirements are satisfied.

120

121

122 **Materials and Methods**

123 **Cloning, expression, and purification of recombinant AGO proteins**

124 Recombinant AGO2 and AGO3 were purified from the insect cells as previously reported (12, 14).

125

126 **In vitro cleavage assay**

127 1  $\mu$ M AGO proteins were incubated with 100 nM 5' phosphorylated synthetic single-stranded  
128 guide RNAs for RISC assembly in 1 $\times$  Reaction Buffer (25 mM HEPES-KOH pH 7.5, 5 mM  
129 MgCl<sub>2</sub>, 50 mM KCl, 5 mM DTT, 0.2 mM EDTA, 0.05 mg/mL BSA (Ambion), and 5 U/ $\mu$ L  
130 RiboLock RNase Inhibitor (Thermo Scientific)). 5' cap-labeled target RNAs were added in the  
131 reaction for the target cleavage. The reaction was directly quenched with 2 $\times$  urea quench dye (7  
132 M urea, 1 mM EDTA, 0.05% (w/v) xylene cyanol, 0.05% (w/v) bromophenol blue, 10% (v/v)  
133 phenol). The cleavage products were resolved on a 7M urea 16% (w/v) polyacrylamide gel.

134

135 **Validation of modified 14-nt miR-20a by in vitro cleavage assay**

136 1  $\mu$ M recombinant AGO3 was incubated with the 14ss, the 14md, or the 23ss for 1 hour at 37 °C  
137 followed by target cleavage as described above.

138

139 **In vitro cleavage assay using FLAG-AGO programmed within the cell**

140 10  $\mu$ g of pCAGEN vector encoding FLAG-AGO2, FLAG-AGO3, or FLAG-AGO3 (E638A) was  
141 transfected into HEK293T cells. After 24 hours, the 14ss, the 14md, or the 23ds was transfected.  
142 24 hours later, the cells were harvested and lysed by sonication. The amount of FLAG-AGO  
143 proteins in the cell lysate was normalized based on the western blot result. AGO was quantified  
144 by using a standard curve generated with known amounts of recombinant FLAG-AGO3 (14).  
145 The overexpressed FLAG-AGOs were immunoprecipitated with 50  $\mu$ L anti-FLAG M2 beads.  
146 After the beads were washed with IP Wash Buffer, the cap-labeled 60-nt target RNAs were  
147 added for cleavage reaction.

148

149 **Acknowledgements**

150 This work was supported by a Pelotonia Fellowship (to M.S.P.), a Center for RNA Biology  
151 Fellowship (to G.Y.S), the NIH (R01GM124320 and R01GM138997 to K.N.), and the Office of  
152 the Director, NIH (S10OD023582).

153

154 **Author Contributions**

155 M.S.P., G.Y.S. and A.K. expressed and purified recombinant proteins. M.S.P and G.Y.S.  
156 performed biochemical assays. M.S.P., G.Y.S., and K.N. analyzed the data. K.N. designed the  
157 research and wrote the manuscript with input from the other authors.

158



159 **Fig. 1.** 14-nt miR-20a brings out the slicing activity of AGO3. (A) Guide (red) and target (blue)  
160 RNAs used in B-C. The 60-nt target RNAs were cap-labeled. (B) In vitro cleavage assay by  
161 AGO2 and AGO3 with different lengths of miR-20a. Top: representative gel images. Middle:  
162 target cleavage percentages. Data are shown as mean (bar) and individual biological replicates  
163 (dots). Bottom: relative target cleavage (fold) with each guide length against 23 nt. Data are  
164 shown as Mean  $\pm$  SD. (C) Time-course assay of AGO2 and AGO3 with the 14- or 23-nt miR-  
165 20a. Data are shown as Mean  $\pm$  SD. (D) Guide and target RNAs used in E. (E) In vitro target  
166 cleavage using AGO2 and AGO3 with the intact miRNAs (cyan) or 14-nt (orange) tyRNAs. The  
167 number in parentheses indicates the relative target cleavage (fold increase) of each 14-nt tyRNA  
168 against the cognate intact miRNA. Data are shown as Mean  $\pm$  SD. \* $P < 0.05$ ; \*\* $P < 0.01$ ; \*\*\*  $P$   
169  $< 0.001$ ; \*\*\*\*  $P < 0.0001$ ; ns, not significant (Student's t test).

170

171 **Fig. 2.** In vivo loading of 14-nt single-stranded guide RNA makes AGO3 a slicer. (A) 14- and  
172 23-nt miR-20a variants. 14ss is identical to the 14-nt miR-20a in Fig. 1A. p14ss is identical to  
173 14ss, except for the 5'-end radiolabeling (yellow circle). 14md is identical to 14ss, except for  
174 nucleotide modifications (blue: 2'-OMe, Green: 2'-F, red s: Phosphorothionate). 23ss is identical  
175 to the 23-nt miR-20a in Fig. 1A. 23ds is composed of a 23ss (top strand) and a passenger strand  
176 (bottom), the latter of which lacks a 5' monophosphate group so AGOs load the 23ss. p23ds is  
177 identical to 23ds, except for the 5'-end radiolabeling. (B) RISC assembly assay. Either p14ss or  
178 p23ds was added to the lysate of HEK293T cells expressing FLAG-AGO2, -AGO3, or -AGO3  
179 (E638A). (C) In vitro target cleavage using AGOs programmed in cell lysate. Either 14ss or 23ds  
180 was added to the lysate of HEK293T cells expressing FLAG-AGO2, -AGO3, or -AGO3  
181 (E638A). (D) In vitro cleavage assay of recombinant AGO3 programmed with 14ss, 14md or  
182 23ss. (E) In vitro cleavage assay using AGOs programmed within cell. Either 14ss, 14md or 23ds  
183 was transfected into HEK293T cells expressing FLAG-AGO2 or -AGO3.

184

185

186

187 **References**

- 188 1. A. Kozomara, M. Birgaoanu, S. Griffiths-Jones, miRBase: from microRNA sequences to  
189 function. *Nucleic Acids Res* **47**, D155-D162 (2019).
- 190 2. D. P. Bartel, Metazoan MicroRNAs. *Cell* **173**, 20-51 (2018).
- 191 3. H. Zhang, F. A. Kolb, L. Jaskiewicz, E. Westhof, W. Filipowicz, Single processing center  
192 models for human Dicer and bacterial RNase III. *Cell* **118**, 57-68 (2004).
- 193 4. I. J. Macrae *et al.*, Structural basis for double-stranded RNA processing by Dicer. *Science*  
194 **311**, 195-198 (2006).
- 195 5. K. Nakanishi, Anatomy of RISC: how do small RNAs and chaperones activate Argonaute  
196 proteins? *Wiley Interdiscip Rev RNA* **7**, 637-660 (2016).
- 197 6. C. Kuscu *et al.*, tRNA fragments (tRFs) guide Ago to regulate gene expression post-  
198 transcriptionally in a Dicer-independent manner. *RNA* **24**, 1093-1105 (2018).
- 199 7. P. Gangras, D. M. Dayeh, J. W. Mabin, K. Nakanishi, G. Singh, Cloning and Identification  
200 of Recombinant Argonaute-Bound Small RNAs Using Next-Generation Sequencing.  
201 *Methods Mol Biol* **1680**, 1-28 (2018).
- 202 8. P. Kumar, J. Anaya, S. B. Mudunuri, A. Dutta, Meta-analysis of tRNA derived RNA  
203 fragments reveals that they are evolutionarily conserved and associate with AGO proteins to  
204 recognize specific RNA targets. *BMC Biol* **12**, 78 (2014).
- 205 9. P. Baldrich *et al.*, Plant Extracellular Vesicles Contain Diverse Small RNA Species and Are  
206 Enriched in 10- to 17-Nucleotide "Tiny" RNAs. *Plant Cell* **31**, 315-324 (2019).
- 207 10. J. Liu *et al.*, Argonaute2 is the catalytic engine of mammalian RNAi. *Science* **305**, 1437-  
208 1441 (2004).
- 209 11. G. Meister *et al.*, Human Argonaute2 mediates RNA cleavage targeted by miRNAs and  
210 siRNAs. *Mol Cell* **15**, 185-197 (2004).
- 211 12. M. S. Park *et al.*, Human Argonaute3 has slicer activity. *Nucleic Acids Res* **45**, 11867-11877  
212 (2017).
- 213 13. D. M. Dayeh, B. C. Kruithoff, K. Nakanishi, Structural and functional analyses reveal the  
214 contributions of the C- and N-lobes of Argonaute protein to selectivity of RNA target  
215 cleavage. *J Biol Chem* **293**, 6308-6325 (2018).
- 216 14. M. S. Park *et al.*, Multidomain Convergence of Argonaute during RISC Assembly  
217 Correlates with the Formation of Internal Water Clusters. *Mol Cell* (2019).
- 218 15. S. Iwasaki, Y. Tomari, Reconstitution of RNA Interference Machinery. *Methods Mol Biol*  
219 **1680**, 131-143 (2018).
- 220 16. W. F. Lima *et al.*, Single-stranded siRNAs activate RNAi in animals. *Cell* **150**, 883-894  
221 (2012).
- 222

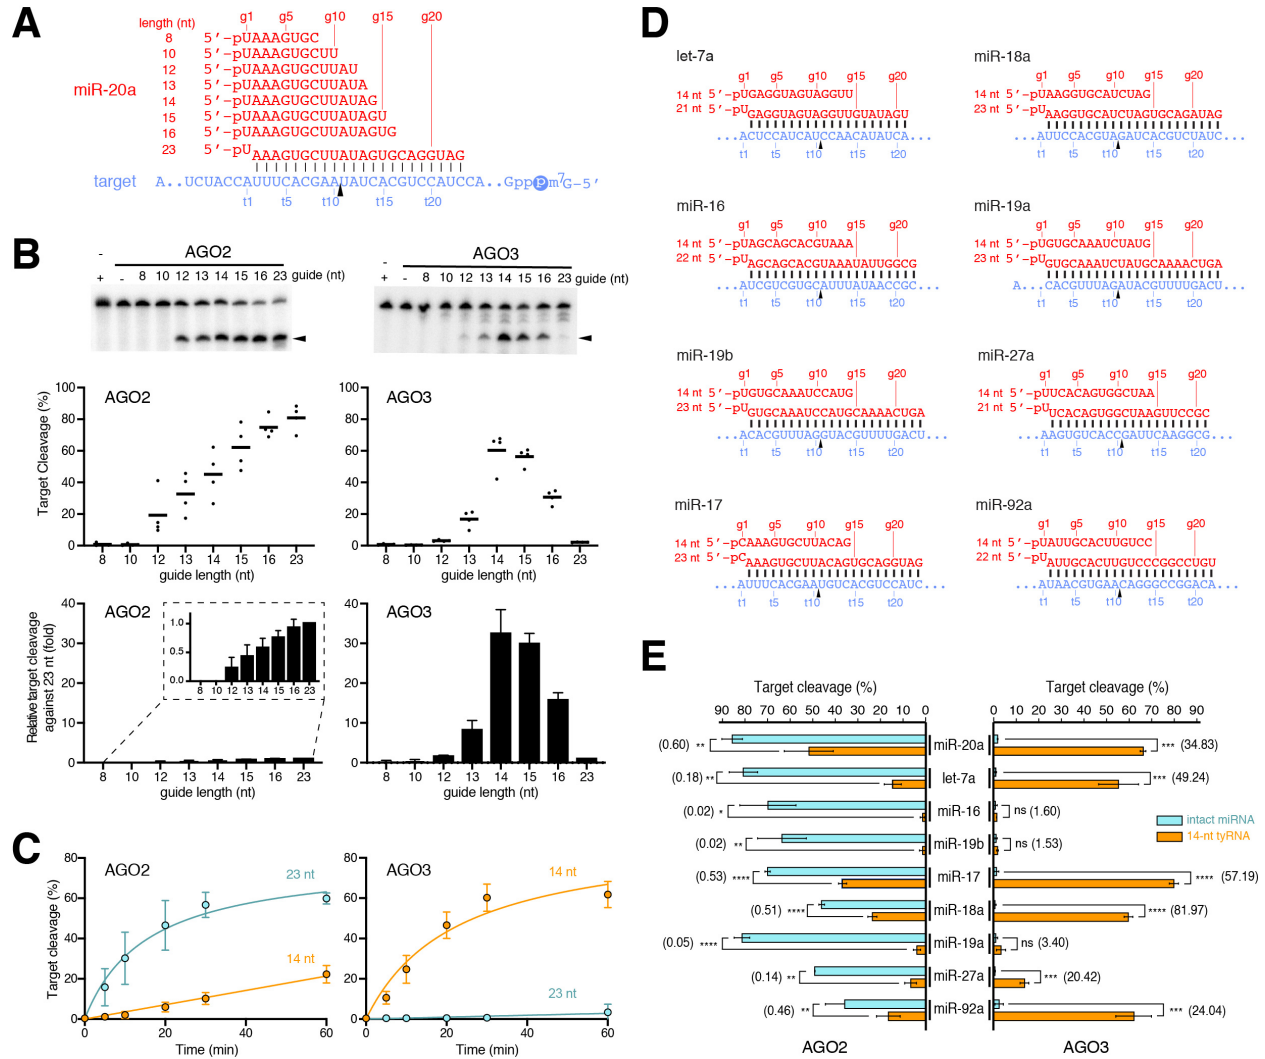

**Fig. 1**

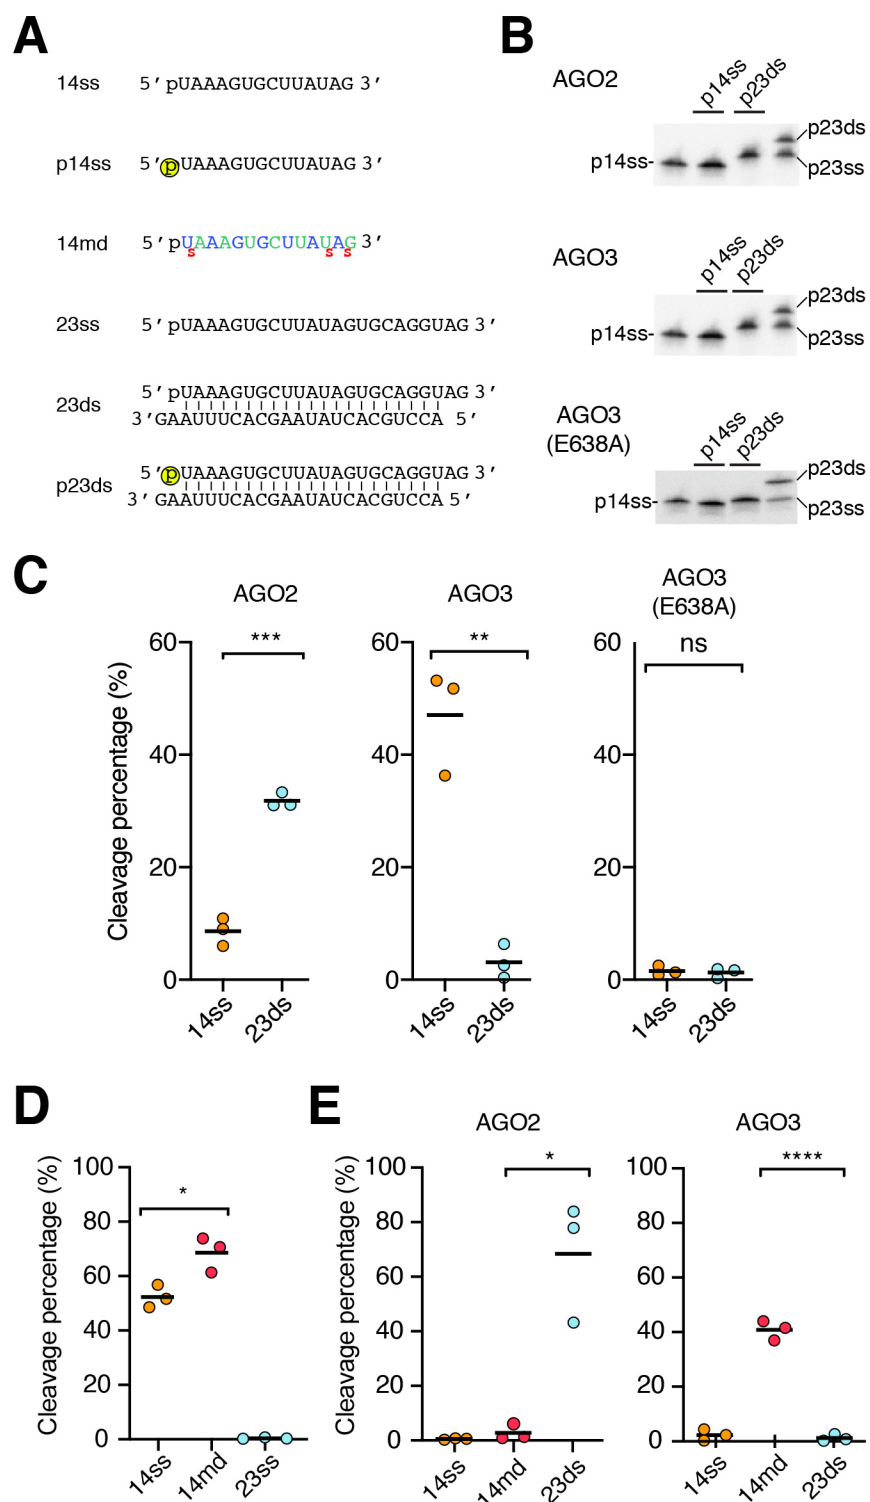

**Fig. 2**
